# Supplementary material for: Miniprep assisted proteomics (MAP) for rapid proteomics sample preparation
Source: Royal Society of Chemistry journal article supplement (doi:10.1039/d2ay01549h), 2022-11-14
Supplement: d2ay01549h1.pdf [file d2ay01549h1.pdf]

Supplementary Information for:

## **Miniprep Assisted Proteomics (MAP) for Rapid Spin-Binding Proteomics Sample Preparation**

C. Bruce Mousseau<sup>1</sup>, Camille A. Pierre<sup>1</sup>, Daniel D. Hu<sup>1</sup>, Matthew M. Champion<sup>\*1,2</sup>

<sup>1</sup>Department of Chemistry and Biochemistry, and <sup>2</sup>Berthiaume Institute for Precision Health, University of Notre Dame, Notre Dame, IN 46556.

\*Corresponding Author:  
Matthew M. Champion  
Email: [mchampio@nd.edu](mailto:mchampio@nd.edu)  
Phone: 574-631-1787

### **Table of Contents:**

- Supplemental Figure 1 : MALDI spectra from digests performed using MAP for 0.5-20 µg BSA. The table above includes peptide matches, sequence coverage, and MASCOT PMF scores derived from the MALDI spectra above.
- Supplementary Table 1: Peptide spectral information from database search
- Supplemental Figure 2 : SDS-PAGE protein capacity experiments with DNA miniprep filters. Loading increasing amount of protein on the filters demonstrates minimum-maximum capacity of the filters. Shown here, a capacity of at least 500 µg of BSA (A) and 500 µg of *E. coli* lysate (B&C).
- Supplemental Figure 3: Log-scale LFQ intensities of proteins identified in both preparation methods.
- Supplemental Sheet 1: Excel formatted tabular processed data from manuscript.

**SI Figure 1**

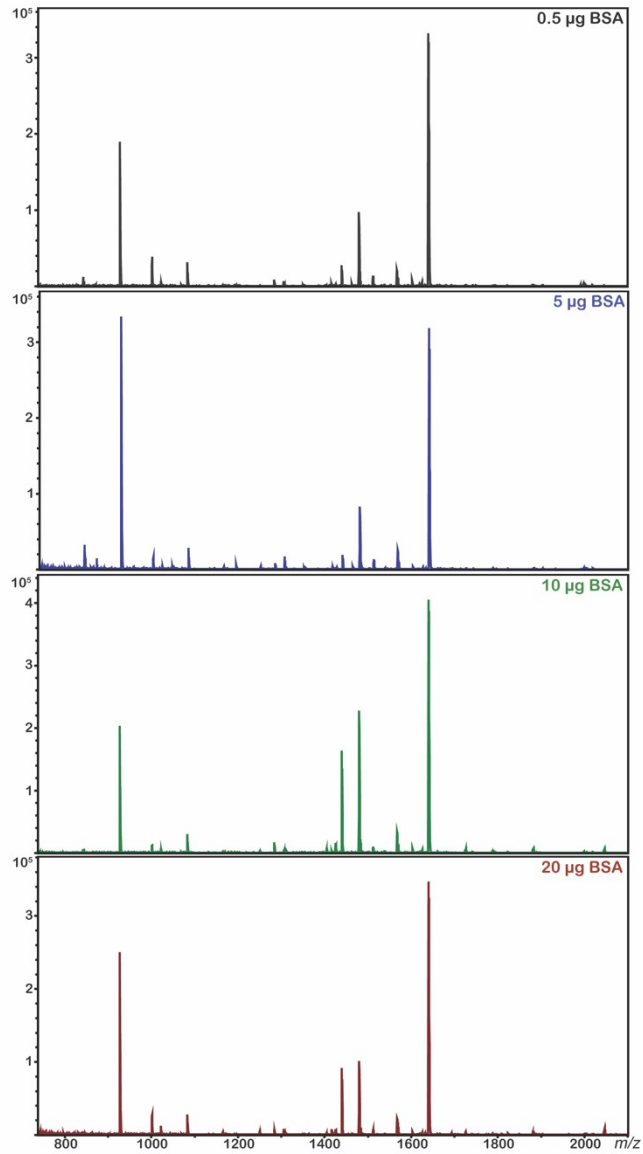

**SI Figure 1.** MALDI spectra from digests performed using MAP for 0.5-20 µg BSA. The table above includes peptide matches, sequence coverage, and MASCOT scores derived from the MALDI spectra above x axis is m/z ratio, y-axis is intensity [a.u.].

SI Table 1:

| <b><u>Sample (MAP Digest)</u></b> | <b><u>Peptides</u></b> | <b><u>Sequence Coverage (%)</u></b> | <b><u>MASCOT Score</u></b> |
|-----------------------------------|------------------------|-------------------------------------|----------------------------|
| <b>0.5 µg BSA</b>                 | 28                     | 46                                  | 132                        |
| <b>5 µg BSA</b>                   | 29                     | 45                                  | 139                        |
| <b>10 µg BSA</b>                  | 30                     | 56                                  | 154                        |
| <b>20 µg BSA</b>                  | 29                     | 45                                  | 180                        |

**SI Table 1.** Relevant data from a PMF search using Mascot

**SI Figure 2**

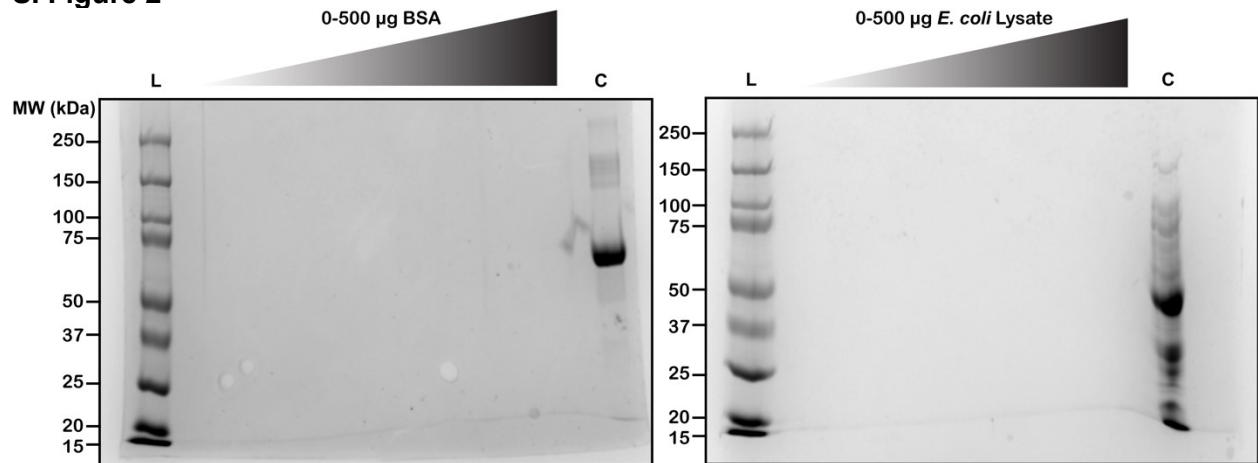

**SI Figure 2:** SDS-PAGE protein capacity experiments with DNA miniprep filters.

Loading increasing amounts of protein on the filters demonstrates if flow-through contains protein due to over-capacity. Shown here, the filters demonstrate a capacity of at least 500 µg of BSA (left) and *E. coli* lysate (right). "L" lane is molecular weight ladder, "C" lane is a control sample of 25µg unfiltered protein.

**SI Figure 3:**

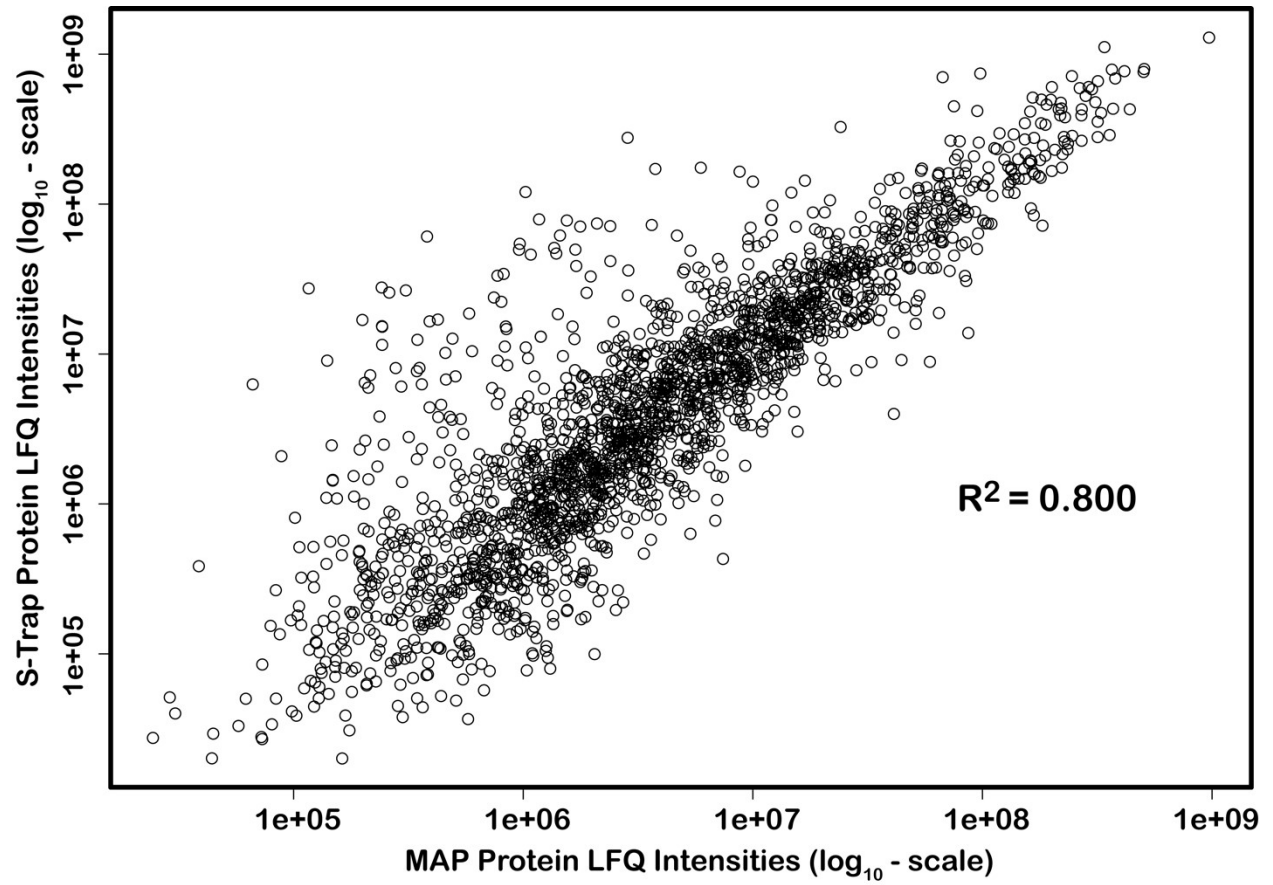

**SI Figure 5:** Log-scale LFQ intensities of proteins identified by both preparations. The data are linear ( $R^2 = 0.800$ ) between the two filter-based approaches.
